# Supplementary material for: Integrated Care Components in Transitional Care Models from Hospital to Home for Frail Older Adults: A Systematic Review
Source: PubMed Central journal article supplement (PMC9248982; doi:10.5334/ijic.6447), 2022-06-29
Supplement: ijic-22-2-6447-s1.pdf [file ijic-22-2-6447-s1.pdf]

Supplementary file 1. Electronic search terms per database

Date when search was performed: July 30, 2020

| <b>NUMBER</b> | <b>PUBMED</b>                              | <b>EMBASE</b>                       | <b>CINAHL</b>                           |
|---------------|--------------------------------------------|-------------------------------------|-----------------------------------------|
| 1             | frail elderly [MeSH]                       | 'Frail elderly'/exp                 | (MH "Frail Elderly")                    |
| 2             | geriatrics [MeSH]                          | 'geriatrics'/exp                    | (MH "Geriatrics")                       |
| 3             | multimorbidity [MeSH]                      | 'multiple chronic conditions'/exp   | (MH "Chronic Disease+")                 |
| 4             | elder [Title/Abstract]                     | elder:ti,ab,kw                      | TI elder                                |
| 5             | frail senior [Title/Abstract]              | Frail:ti,ab,kw                      | AB elder                                |
| 6             | geriatr* [Title/Abstract]                  | senior:ti,ab,kw                     | TI frail senior                         |
| 7             | multimorbid* [Title/Abstract]              | geriatr*:ti,ab,kw                   | AB frail senior                         |
| 8             | Transitional care [MeSH]                   | multimorbid*:ti,ab,kw               | TI geriatr*                             |
| 9             | continuity of patient care [MeSH]          | 'transitional care'/exp             | AB geriatr*                             |
| 10            | delivery of health care, integrated [MeSH] | 'patient care'/exp                  | TI multimorbid*                         |
| 11            | care continuity [Title/Abstract]           | 'integrated health care system'/exp | AB multimorbid*                         |
| 12            | continuity [Title/Abstract]                | care AND continuity:ti,ab,kw        | (MH "Transitional Care")                |
| 13            | transition [Title/Abstract]                | continuity:ab,ti,kw                 | (MH "Continuity of Patient Care+")      |
| 14            | transitional care [Title/Abstract]         | transition:ti,ab,kw                 | (MH "Health Care Delivery, Integrated") |
| 15            | integrated care [Title/Abstract]           | transitional AND care:ti,ab,kw      | TI care continuity                      |
| 16            | hospitalization [MeSH]                     | integrated AND care:ti,ab,kw        | AB care continuity                      |
| 17            | hospitals [Title/Abstract]                 | 'hospitalization'/exp               | TI continuity                           |
| 18            | hospitalization [Title/Abstract]           | Hospitals:ti,ab,kw                  | AB continuity                           |
| 19            | patient discharge [Title/Abstract]         | hospitalization:ti,ab,kw            | TI transition                           |

|           |                                                                                    |                                            |                                            |
|-----------|------------------------------------------------------------------------------------|--------------------------------------------|--------------------------------------------|
| <b>20</b> | OR/1-7                                                                             | Patient AND<br>discharge:ti,ab,kw          | AB transition                              |
| <b>21</b> | OR/8-15                                                                            | OR/1-8                                     | TI transitional care                       |
| <b>22</b> | OR/16-19                                                                           | OR/9-16                                    | AB transitional care                       |
| <b>23</b> | 20 AND 21 AND 22                                                                   | OR/17-20                                   | TI integrated care                         |
| <b>24</b> | AND (English[Language]) OR<br>(Dutch[Language]) OR<br>(German[Language])           | 21 AND 22 AND 23                           | AB integrated care                         |
| <b>25</b> | AND ("2000/01/01"[Date -<br>Publication]<br>: "2020/06/01"[Date -<br>Publication]) | AND german:la OR<br>dutch:la OR english:la | (MH "Hospitalization+")                    |
| <b>26</b> |                                                                                    | AND [1-1-2000]/sd NOT<br>[2-6-2020]/sd     | TI hospitals                               |
| <b>27</b> |                                                                                    |                                            | AB hospitals                               |
| <b>28</b> |                                                                                    |                                            | TI hospitalization                         |
| <b>29</b> |                                                                                    |                                            | AB hospitalization                         |
| <b>30</b> |                                                                                    |                                            | TI patient discharge                       |
| <b>31</b> |                                                                                    |                                            | AB patient discharge                       |
| <b>32</b> |                                                                                    |                                            | OR/ 1-11                                   |
| <b>33</b> |                                                                                    |                                            | OR/12-24                                   |
| <b>34</b> |                                                                                    |                                            | OR/25-31                                   |
| <b>35</b> |                                                                                    |                                            | 32 AND 33 AND 34                           |
| <b>36</b> |                                                                                    |                                            | AND LA english OR LA<br>dutch OR LA german |
| <b>37</b> |                                                                                    |                                            | AND Publication Date<br>limitation         |
